# Supplementary material for: The association of coagulation indicators with in-hospital acute kidney injury and malignant events of patients with acute aortic dissection: a retrospective cohort study
Source: PubMed Central journal article supplement — J Thorac Dis. 2023 Feb 21;15(2):658–67. doi: 10.21037/jtd-23-38 (PMC9992596; doi:10.21037/jtd-23-38), 2023-02-21
Supplement: jtd-15-02-658-dss.pdf [file jtd-15-02-658-dss.pdf]

## Data Sharing Statement

|                     |                                                                                                                                                     |                                                                            |
|---------------------|-----------------------------------------------------------------------------------------------------------------------------------------------------|----------------------------------------------------------------------------|
| <b>Article Info</b> | <a href="https://dx.doi.org/10.21037/jtd-23-38">https://dx.doi.org/10.21037/jtd-23-38</a>                                                           |                                                                            |
| <b>Item</b>         | <b>Question</b>                                                                                                                                     | <b>Authors' Response<br/>(place "-" if not applicable)</b>                 |
| 1                   | Would you like to share data collected for your study to others?                                                                                    | No.                                                                        |
| 2                   | If not, would you like to share the reason for your decision?                                                                                       | Our hospital refuse to share the data because of patient privacy concerns. |
| 3                   | What data in particular will be shared?                                                                                                             | -                                                                          |
| 4                   | Any other documents will be shared? Such as study protocol, statistical analysis plan, informed consent form, clinical study report, analytic code. | -                                                                          |
| 5                   | When will data availability begin?                                                                                                                  | -                                                                          |
| 6                   | When will data availability end?                                                                                                                    | -                                                                          |
| 7                   | To whom will you share the data?                                                                                                                    | -                                                                          |
| 8                   | For what type of analysis or purpose?                                                                                                               | -                                                                          |
| 9                   | How or where can the data/documents be obtained?                                                                                                    | -                                                                          |
| 10                  | Any other restrictions?                                                                                                                             | -                                                                          |
