# Supplementary material for: The association of coagulation indicators with in-hospital acute kidney injury and malignant events of patients with acute aortic dissection: a retrospective cohort study
Source: PubMed Central journal article supplement — J Thorac Dis. 2023 Feb 21;15(2):658–67. doi: 10.21037/jtd-23-38 (PMC9992596; doi:10.21037/jtd-23-38), 2023-02-21
Supplement: jtd-15-02-658-supplementary.pdf [file jtd-15-02-658-supplementary.pdf]

**Table S1** Baseline clinical characteristics after propensity matching cohorts

| Characteristic                                  | Normal coagulation (n=168) | Abnormal coagulation (n=168) | P value |
|-------------------------------------------------|----------------------------|------------------------------|---------|
| Age (years), median [IQR]                       | 59 [48-65]                 | 57 [49-65]                   | 0.973   |
| Male, n (%)                                     | 126 (75.0)                 | 140 (83.3)                   | 0.060   |
| Stanford A                                      | 113 (67.3)                 | 114 (67.9)                   | 0.907   |
| Previous history, n (%)                         |                            |                              |         |
| Smoking                                         | 105 (62.5)                 | 115 (68.5)                   | 0.251   |
| Drinking                                        | 24 (14.3)                  | 31 (18.5)                    | 0.302   |
| Hypertension                                    | 152 (90.5)                 | 143 (85.1)                   | 0.134   |
| Marfan syndrome                                 | 3 (1.8)                    | 4 (2.4)                      | 1.000   |
| Heart surgery history                           | 1 (0.6)                    | 1 (0.6)                      | 1.000   |
| Arteriosclerosis                                | 8 (4.8)                    | 10 (6.0)                     | 0.628   |
| Coronary heart disease                          | 9 (5.4)                    | 12 (7.1)                     | 0.499   |
| Cardiac insufficiency                           | 6 (3.6)                    | 3 (1.8)                      | 0.502   |
| Atrial fibrillation                             | 3 (1.8)                    | 6 (3.6)                      | 0.502   |
| Aortic valve disease                            | 12 (7.1)                   | 8 (4.8)                      | 0.356   |
| Diabetes mellitus type 2                        | 17 (10.1)                  | 10 (6.0)                     | 0.160   |
| COPD/asthma                                     | 7 (4.2)                    | 2 (1.2)                      | 0.174   |
| Cerebrovascular disease                         | 6 (3.6)                    | 8 (4.8)                      | 0.585   |
| Anemia                                          | 53 (31.5)                  | 61 (36.3)                    | 0.357   |
| Hypoproteinemia                                 | 144 (85.7)                 | 137 (81.5)                   | 0.302   |
| Hyperuricemia                                   | 82 (48.8)                  | 84 (50.0)                    | 0.827   |
| Clinical feature                                |                            |                              |         |
| Systolic blood pressure, mean $\pm$ SD          | 158.5 $\pm$ 30.9           | 160.2 $\pm$ 33.5             | 0.643   |
| Diastolic blood pressure, mean $\pm$ SD         | 89.0 $\pm$ 21.4            | 88.7 $\pm$ 23.8              | 0.897   |
| BP asymmetry in extremities, n (%)              | 131 (78.0)                 | 136 (81.0)                   | 0.500   |
| Pulse press, mean $\pm$ SD                      | 70.0 $\pm$ 20.1            | 71.5 $\pm$ 21.1              | 0.386   |
| Heart rate, mean $\pm$ SD                       | 80.2 $\pm$ 15.8            | 77.5 $\pm$ 18.6              | 0.150   |
| Chest pain, n (%)                               | 139 (82.7)                 | 143 (85.1)                   | 0.552   |
| Back pain, n (%)                                | 113 (67.3)                 | 129 (76.8)                   | 0.052   |
| Abdominal pain, n (%)                           | 41 (24.4)                  | 30 (17.9)                    | 0.142   |
| Murmur in aortic valve auscultation area, n (%) | 35 (20.8)                  | 45 (26.8)                    | 0.200   |
| Organ or limb ischemia, n (%)                   | 52 (31.0)                  | 60 (35.7)                    | 0.355   |
| Hypotensive shock, n (%)                        | 7 (4.2)                    | 8 (4.8)                      | 0.792   |

IQR, interquartile range; SD, standard deviation; COPD, chronic obstructive pulmonary disease; BP, blood pressure.
